# Supplementary material for: Are seamounts refuge areas for fauna from polymetallic nodule fields?
Source: Copernicus journal article supplement (doi:10.5194/bg-2019-304), 2019-08-12
Supplement: Supplementary file 1 [file bg-2019-304-supplement.pdf]

## Supplementary material

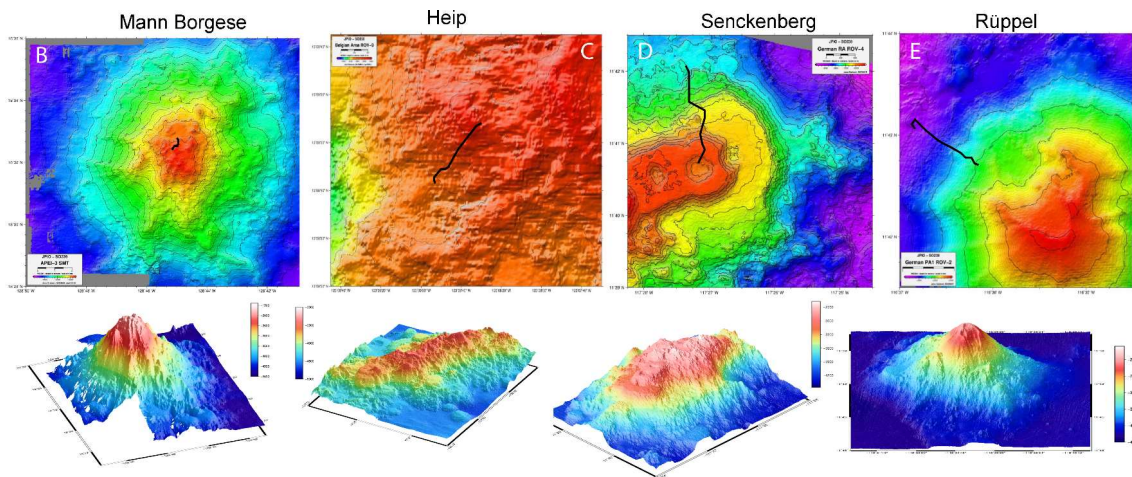

Fig. S1. Location of the seamount transects carried out towards the summit on the north – north-western flank and seamount profiles. Rüppel (BGR, ROV02) and Mann Borgese (APE13, ROV15) are single seamounts, while Senckenberg (BGR, ROV04) and Heip (GSR, ROV09) are sea-mountain ranges.
